# Supplementary material for: Molecular Pap smear: HPV genotype and DNA methylation of ADCY8, CDH8, and ZNF582 as an integrated biomarker for high-grade cervical cytology
Source: PubMed Central journal article supplement (PMC5022163; doi:10.1186/s13148-016-0263-9), 2016-09-13
Supplement: 13148_2016_263_MOESM1_ESM.pdf [file 13148_2016_263_MOESM1_ESM.pdf]

**Supplementary Table S1** Genes screened for promoter methylation in cervical cytology samples

| Gene   | Assay <sup>a</sup>       | Gene name                                     | Chr | Gene-encoded protein function                                                                                                                                                 |
|--------|--------------------------|-----------------------------------------------|-----|-------------------------------------------------------------------------------------------------------------------------------------------------------------------------------|
| ADCY8  | ADCY8_a1                 | adenylate cyclase 8 (brain)                   | 8   | Membrane-bound enzyme that catalyzes the formation of cyclic AMP from ATP.                                                                                                    |
| ADRA1A | ADRA1A_a1                | adrenergic receptor Alpha-1A                  | 8   | G protein-coupled receptor that activates mitogenic responses and regulates the growth and proliferation of many cells.                                                       |
| AKT1   | AKT1_01                  | v-akt murine thymoma viral oncogene homolog 1 | 14  | Serine-threonine protein kinase that regulates many processes including metabolism, proliferation, cell survival, growth and angiogenesis.                                    |
| AKT3   | AKT3_01                  | v-akt murine thymoma viral oncogene homolog 3 | 1   | Serine-threonine protein kinase that regulates many processes including metabolism, proliferation, cell survival, growth and angiogenesis.                                    |
| ALK    | ALK_a5, _a7 <sup>b</sup> | anaplastic lymphoma receptor tyrosine kinase  | 2   | Receptor tyrosine kinase belonging to the insulin receptor superfamily.                                                                                                       |
| APC    | APC_a1, _a3              | adenomatous polyposis coli                    | 5   | Tumor suppressor protein that acts as an antagonist of the Wnt signaling pathway and is also involved in cell migration, adhesion, transcriptional activation, and apoptosis. |
| BCAR3  | BCAR3_03                 | breast cancer anti-estrogen resistance 3      | 1   | Component of intracellular signal transduction that causes estrogen-independent proliferation in human breast cancer cells.                                                   |
| BMP2   | BMP2_01                  | bone morphogenetic protein 2                  | 20  | Transforming growth factor-beta (TGFB) superfamily.                                                                                                                           |
| BMP3   | BMP3_01, _02             | bone morphogenetic protein 3                  | 4   | Transforming growth factor-beta (TGFB) superfamily.                                                                                                                           |
| BMP4   | BMP4_01                  | bone morphogenetic protein 4                  | 14  | Transforming growth factor-beta (TGFB) superfamily.                                                                                                                           |
| BMP7   | BMP7_01                  | bone morphogenetic protein 7                  | 20  | Transforming growth factor-beta (TGFB) superfamily.                                                                                                                           |

|         |               |                                                    |    |                                                                                                                                                                         |
|---------|---------------|----------------------------------------------------|----|-------------------------------------------------------------------------------------------------------------------------------------------------------------------------|
| CCNA1   | CCNA1_01      | cyclin A1                                          | 13 | Cyclin that binds to important cell cycle regulators, such as Rb family proteins, transcription factor E2F-1, and the p21 family proteins.                              |
| CDH8    | CDH8_01       | cadherin 8, type 2                                 | 16 | Type II cadherin integral membrane protein that mediates calcium-dependent cell-cell adhesion.                                                                          |
| CDH13   | CDH13_yh1     | cadherin 13                                        | 16 | Cadherin localized on the cell membrane that is anchored by a GPI moiety, rather than by a transmembrane domain. This gene is hypermethylated in many types of cancers. |
| CDKN2A  | CDKN2A_01,_02 | cyclin-dependent kinase inhibitor 2A               | 9  | Isoforms function as inhibitors of CDK4 kinase or stabilizers of the tumor suppressor protein p53. This gene is mutated or deleted in many types of cancers.            |
| Chr3_a1 | Chr3_a1       | intergenic region                                  | 3  | DMR in oral, endometrial and breast cancers. <sup>c</sup>                                                                                                               |
| Chr3_a2 | Chr3_a2       | intergenic region                                  | 3  | DMR in oral, endometrial and breast cancers. <sup>c</sup>                                                                                                               |
| Chr7_a1 | Chr7_a1       | intergenic region                                  | 3  | DMR in oral, endometrial and breast cancers. <sup>c</sup>                                                                                                               |
| Chr7_a2 | Chr7_a2       | intergenic region                                  | 3  | DMR in oral, endometrial and breast cancers. <sup>c</sup>                                                                                                               |
| Chr7_a3 | Chr7_a3       | intergenic region                                  | 3  | DMR in oral, endometrial and breast cancers. <sup>c</sup>                                                                                                               |
| Chr7_a4 | Chr7_a4       | intergenic region                                  | 3  | DMR in oral, endometrial and breast cancers. <sup>c</sup>                                                                                                               |
| Chr8_a1 | Chr8_a1       | intergenic region                                  | 3  | DMR in oral, endometrial and breast cancers. <sup>c</sup>                                                                                                               |
| CMTM1   | CMTM1_01      | CKLF-like MARVEL transmembrane domain containing 1 | 16 | Chemokine and the 4 transmembrane superfamilies of signaling molecules.                                                                                                 |

|        |                               |                                                                                               |    |                                                                                                                                                                                                                         |
|--------|-------------------------------|-----------------------------------------------------------------------------------------------|----|-------------------------------------------------------------------------------------------------------------------------------------------------------------------------------------------------------------------------|
| DAPK1  | DAPK1_01                      | death-associated protein kinase 1                                                             | 9  | Serine-threonine kinase that mediates gamma-interferon-induced programmed cell death.                                                                                                                                   |
| EPHA5  | EPHA5_01                      | EPH receptor A5                                                                               | 4  | Ephrin receptor subfamily of the protein-tyrosine kinase family.                                                                                                                                                        |
| EPHB1  | EPHB1_01,_02                  | EPH receptor B1                                                                               | 3  | Ephrin receptor subfamily of the protein-tyrosine kinase family.                                                                                                                                                        |
| EPHB3  | EPHB3_04,_05                  | EPH receptor B3                                                                               | 3  | Ephrin receptor subfamily of the protein-tyrosine kinase family.                                                                                                                                                        |
| FOXA1  | FOXA1_a1,_a2,_a3 <sup>d</sup> | forkhead box A1                                                                               | 14 | Forkhead class of DNA-binding proteins that function as a hepatocyte transcriptional activator.                                                                                                                         |
| FOXB2  | FOXB2_a2_02 <sup>d</sup>      | forkhead box AB2                                                                              | 9  | Forkhead class of DNA-binding proteins.                                                                                                                                                                                 |
| FOXE1  | FOXE1_01                      | forkhead box E1                                                                               | 9  | Forkhead class of DNA-binding proteins that functions as a thyroid transcription factor.                                                                                                                                |
| GSTP1  | GSTP1_a1                      | glutathione S-transferase pi 1                                                                | 11 | Glutathione S-transferases (GSTs) are enzymes that detoxify hydrophobic and electrophilic compounds. They play a role in susceptibility to cancer.                                                                      |
| HIF1A  | HIF1A_01                      | Hypoxia-inducible factor 1, alpha subunit                                                     | 14 | Alpha subunit of the transcription factor hypoxia-inducible factor-1 (HIF-1), which acts as a master regulator of cellular and systemic homeostatic responses to hypoxia by activating the transcription of many genes. |
| IRS1   | IRS1_05                       | insulin receptor substrate 1                                                                  | 2  | Cellular protein that is phosphorylated by insulin receptor tyrosine kinase and mediates the control of various cellular processes by insulin.                                                                          |
| KDM6B  | KDM6B_a2,_a3                  | lysine (K)-specific demethylase 6B                                                            | 17 | Histone demethylase that specifically demethylates 'Lys-27' of histone H3, thereby catalyzing the removal of methyl groups from lysine and arginine residues on histone tails.                                          |
| L1-MET | L1-MET_a1                     | LINE-1 MET<br>Long interspersed nuclear elements MET proto-oncogene, receptor tyrosine kinase | 7  | A specific LINE 1 located within the <i>MET</i> oncogene. <sup>e</sup>                                                                                                                                                  |

|         |                           |                                                                 |    |                                                                                                                                                                                           |
|---------|---------------------------|-----------------------------------------------------------------|----|-------------------------------------------------------------------------------------------------------------------------------------------------------------------------------------------|
| LINE1   | LINE1_a1 sup <sup>e</sup> | Long interspersed nuclear elements                              | 22 | Group of genetic elements found in large numbers in eukaryotic genomes.                                                                                                                   |
| MGMT    | MGMT_01                   | O-6-methylguanine-DNA methyltransferase                         | 10 | O-6-methylguanine-DNA methyltransferase, an enzyme involved in DNA repair that removes alkylating lesions at the O6 of guanine residues.                                                  |
| NEFL    | NEFL_a1cm                 | neurofilament, light polypeptide                                | 8  | Neurofilaments comprise the exoskeleton that maintain the neuronal caliber and intracellular transport to axons and dendrites.                                                            |
| OGG1    | OGG1_03                   | 8-oxoguanine DNA glycosylase                                    | 3  | Glycosylase enzyme responsible for excising 8-oxoguanine, a mutagenic base byproduct that occurs as a result of exposure to reactive oxygen.                                              |
| RARB    | RARB_a1                   | retinoic acid receptor, beta                                    | 3  | Retinoic acid receptor beta binds retinoic acid, the biologically active form of vitamin A, which mediates cellular signaling.                                                            |
| RASSF1  | RASSF1_01,_02,_03         | Ras association domain family member 1                          | 3  | Protein similar to the RAS effector proteins with a tumor suppressor function that is required for death receptor-dependent apoptosis.                                                    |
| SNAI 1  | SNAI 1_01                 | snail family zinc finger 1                                      | 20 | Snail nuclear protein is a zinc finger transcriptional repressor that down-regulates the expression of ectodermal genes within the mesoderm.                                              |
| TCF3_01 | TCF3_01                   | transcription factor 3                                          | 19 | E protein (class I) family of helix-loop-helix transcription factors involved in the initiation of neuronal differentiation.                                                              |
| TSC2    | TSC2_02                   | tuberous sclerosis 2                                            | 16 | Tumor suppressor protein that stimulates specific GTPases. This protein associates with hamartin in a cytosolic complex, possibly acting as a hamartin chaperone.                         |
| TWIST 1 | TWIST 1_01                | twist family bHLH transcription factor 1                        | 7  | Basic helix-loop-helix (bHLH) transcription factor implicated in cell lineage determination and differentiation.                                                                          |
| VEGFA   | VEGFA_01                  | vascular endothelial growth factor A                            | 6  | Glycosylated mitogen that specifically acts on endothelial cells to mediate vascular permeability, induce angiogenesis and vasculogenesis, promote cell migration, and inhibit apoptosis. |
| VHL     | VHL_01                    | von Hippel-Lindau tumor suppressor, E3 ubiquitin protein ligase | 3  | Component of a protein complex involved in ubiquitination and the degradation of hypoxia-inducible-factor (HIF), a transcription factor that regulates gene expression by oxygen.         |

|        |           |                         |    |                                                             |
|--------|-----------|-------------------------|----|-------------------------------------------------------------|
| ZNF582 | ZNF582_01 | zinc finger protein 582 | 19 | Zinc finger protein involved in transcriptional regulation. |
|--------|-----------|-------------------------|----|-------------------------------------------------------------|

Chr, chromosome; DMR, differentially methylated region from MBDcap-seq whole genome screening of 1000 methylomes from <http://cbbiweb.uthscsa.edu/kMethylationWS/ws>.

<sup>a</sup>Assays were designed in-house (alphanumeric suffix) or acquired commercially from QIAGEN (numerical suffix). See Table S2 for assay details.

<sup>b</sup>Reference #48.

<sup>c</sup>Reference #48-50.

<sup>d</sup>Reference #51.

<sup>e</sup>Reference #52.
