# Supplementary material for: Molecular Pap smear: HPV genotype and DNA methylation of ADCY8, CDH8, and ZNF582 as an integrated biomarker for high-grade cervical cytology
Source: PubMed Central journal article supplement (PMC5022163; doi:10.1186/s13148-016-0263-9), 2016-09-13
Supplement: 13148_2016_263_MOESM2_ESM.pdf [file 13148_2016_263_MOESM2_ESM.pdf]

**Supplementary Table S2** List of pyrosequencing assays

| Assay <sup>a</sup> | Primer <sup>b</sup>              | Sequence 5' to 3'                                                                       |
|--------------------|----------------------------------|-----------------------------------------------------------------------------------------|
| ADCY8_a1           | Forward<br>Reverse<br>Sequencing | AGTGGAGGTTAGGGTAAAGTTT<br>Biotin-TAACCCCTCCATAACTATAACCCCCATTAA<br>GGGAGGAGGTTTTAATTATT |
| ADRA1A_a1          | Forward<br>Reverse<br>Sequencing | GGAATTGTATGTTGTAAGGAGTTT<br>Biotin-ACAACCCTAACCAACCCTAAAA<br>TGTAAGGAGTTTTTTGGA         |
| AKT1_01            |                                  | Qiagen Hs_BMP3_01 PM00112595                                                            |
| AKT3_01            |                                  | Qiagen Hs_AKT2_01 PM00086044                                                            |
| ALK_a5             | Forward<br>Reverse<br>Sequencing | AGTTGGGGGAAAGTAAGAGA<br>Biotin-AAAACTCTAAACAATCCTTAATACC<br>GGGGAAAGTAAGAGAT            |
| ALK_a7             | Forward<br>Reverse<br>Sequencing | GGTAGAGGTGGTAGTAGTTGGTATT<br>Biotin-CCCTCCTCACCCATCATCA<br>GTGGTAGTAGTTGGTATTT          |
| APC_a1             | Forward<br>Reverse<br>Sequencing | GGTATGGGGTTAGGGTTAGGTAGG<br>Biotin-AATCCCACAACACCTCCATTCTATCT<br>AGAGAAGTAGTTGTGTAAT    |
| APC_a3             | Forward<br>Reverse<br>Sequencing | GGGTTAGGGTTAGGTAGGTTGT<br>Biotin-AATTACACA ACTACTTCTCTCC<br>GGTTAGGGTTAGGTAGGTT         |
| BCAR3_03           |                                  | Qiagen HS_BCAR3_03 PM00088326                                                           |
| BMP2_01            |                                  | Qiagen HS_BMP2_01 PM00196763                                                            |
| BMP3_01            |                                  | Qiagen Hs_BMP3_01 PM00112595                                                            |
| BMP3_02            |                                  | Qiagen HS_BMP3_02 PM00112602                                                            |
| BMP4_01            |                                  | Qiagen HS_BMP4_01 PM00056525                                                            |
| BMP7_01            |                                  | Qiagen Hs_BMP7_01 PM00079345                                                            |
| CCNA1_01           |                                  | Qiagen Hs_CCNA1_01 PM00162708                                                           |

|           |                                  |                                                                                              |
|-----------|----------------------------------|----------------------------------------------------------------------------------------------|
| CDH8_01   |                                  | Qiagen HS_CDH8_01 PM00062944                                                                 |
| CDH13_yh1 | Forward<br>Reverse<br>Sequencing | Biotin-AGTTTAAAGAAGTAAATGGGATGTTAT<br>TCTACCTCCCAACCAACCAACTTC<br>ACCAAAACCAATAACTTTAC       |
| CDKN2A_01 |                                  | Qiagen Hs_CDKN2A_01 PM00039900                                                               |
| CDKN2A_02 |                                  | Qiagen Hs_CDKN2A_02 PM00039907                                                               |
| Chr3_a1   | Forward<br>Reverse<br>Sequencing | Biotin-AAGAGATGGGGTTTTAGGAAGTG<br>CACCATTCAACATCTAACAAAACTTAAA<br>AATCATTTTTACTTTAAAAATAATA  |
| Chr3_a2   | Forward<br>Reverse<br>Sequencing | GAGTTTTTATGAATGGGATTGGTGTTT<br>Biotin-AAACCTCTAACACCTACAACACTAC<br>GAGTTTATTTATTTTTTTTGTATG  |
| Chr7_a1   | Forward<br>Reverse<br>Sequencing | TGTTTTTGTGTTTTGGTTTTGTAA<br>Biotin-AATAACCAATACAAAACACTTCCCTTACT<br>GTTAAGTTTTTTGTTTTGGG     |
| Chr7_a2   | Forward<br>Reverse<br>Sequencing | TTGAGGGAGTAAGGGAAAGTG<br>Biotin-ACTCTTAAAATTCCTAACACAACACTATC<br>GAGTAAGGGAAAGTGT            |
| Chr7_a3   | Forward<br>Reverse<br>Sequencing | GGAGGAGTTTTTGGAGTAGG<br>Biotin-ACCCTCAACACCAACAAA<br>TGTTAGGAAATTTAAGAGTATT                  |
| Chr7_a4   | Forward<br>Reverse<br>Sequencing | GTGTTGAGGGTTTTGAGATTAT<br>Biotin-ATCCTCCTAACTAAATAAACTACCTCACT<br>TTGTTTTAGAGTTTTTAAG        |
| Chr8_a1   | Forward<br>Reverse<br>Sequencing | TTGGTTTAGAAGTTTTTTATTGAGTATT<br>Biotin-ATCCCCTAATCCACCAAATTTTCATA<br>AGTTTTTTATTGAGTATTTTGTG |
| CMTM1     |                                  | Qiagen Hs_CMTM1_01 PM00061215                                                                |
| DAPK1_01  |                                  | Qiagen Hs_DAPK1_01 PM00041258                                                                |
| EPHA5_01  |                                  | Qiagen Hs_EPHA5_01 PM00018683                                                                |
| EPHB1_01  |                                  | Qiagen Hs_EPHB1_01 PM00015183                                                                |
| EPHB1_02  |                                  | Qiagen_Hs_EPHB1_02 PM00015190                                                                |

|              |                                  |                                                                                                    |
|--------------|----------------------------------|----------------------------------------------------------------------------------------------------|
| EPHB3_04     |                                  | Qiagen Hs_EPHB3_04 PM00109641                                                                      |
| EPHB3_05     |                                  | Qiagen Hs_EPHB3_05 PM00109648                                                                      |
| FHIT_01      |                                  | Qiagen Hs_FHIT_01 PM00017129                                                                       |
| FOXA1_a1     | Forward<br>Reverse<br>Sequencing | GGATAATAAAGTTATTTGTTGGGAAATAGA<br>Biotin-CTTACACCCCAAACCTCAAAAACCTAATTC<br>ATGTTTATAGGTGATTTGTTTTA |
| FOXA1_a2     | Forward<br>Reverse<br>Sequencing | GAGGGGGTTTTGGAAGTT<br>Biotin-CTAACCCCAAACAATACAAAACACTTT<br>GGTTTTGGAAGTTAGT                       |
| FOXA1_a3     | Forward<br>Reverse<br>Sequencing | ATTTTTTTGGGGTTATTTTTTTGTGAG<br>Biotin- ACCCAAACCTAAATTCATATTACTAAC<br>TTTTTTTTGTAGTGTAAAGATAT      |
| FOXB2_a2     | Forward<br>Reverse<br>Sequencing | GAGTATATATAGAGTTGGTAGAATAGTT<br>Biotin- ATAATAAAAATAAAAATACCCTCCC<br>AGAATAGTTTGAGTTATAATTTTTT     |
| FOXB2_02     |                                  | Qiagen Hs_CDKN2A_02 PM00039907                                                                     |
| FOXE1_01     |                                  | Qiagen Hs_FOXE1_01 PM00041013                                                                      |
| GSTP1_a1     | Forward<br>Reverse<br>Sequencing | GAGTTAGAGGGATTTTTTAGAAGAG<br>CAATTAACCCCATACTAAAACTCT<br>GGAGAGGGGAGGGATTATTTTTATA                 |
| HIF1A_01     |                                  | Qiagen Hs_HIF1A PM00056147                                                                         |
| IRS1_05      |                                  | Qiagen Hs_IRS1_05 PM00011711                                                                       |
| KDM6B_a2     | Forward<br>Reverse<br>Sequencing | TAGGGAGTTTTGAGGATAAGTAGGG<br>Biotin-CACATACCCTTCTATATTTACCTTCATATT<br>GAAGGTAGATAGATTTTTAAATTTT    |
| KDM6B_a3     | Forward<br>Reverse<br>Sequencing | GTTATAGGGAGTTTTGAGGATAAGT<br>Biotin-ACATACCCTTCTATATTTACCTTCATATT<br>GAGGAGTGTAGTAAGGA             |
| L1-MET_a1    | Forward<br>Reverse<br>Sequencing | ATTGTTTGGTATTTTTTAGTGAGATGAA<br>Biotin-ATCATAATCCTCCAACCACTAC<br>ATTTTAGATGGAAATGTAGAAA            |
| LINE 1_a1sup | Forward<br>Reverse<br>Sequencing | TTGGAAGAGTAAGGGTTAGG<br>Biotin-ACCCTCTAAACCAAATATAAAATATAAT<br>GAAAATCGGGTATTTT                    |

|            |                                  |                                                                                       |
|------------|----------------------------------|---------------------------------------------------------------------------------------|
| MGMT       |                                  | Qiagen Hs_MGMT_01 PM00149702                                                          |
| NEFL       | Forward<br>Reverse<br>Sequencing | AGTTGGAGTAGTAGAATAAGGT<br>Biotin-ATTACCCAAAATCTCCTCCAACCCCTTC<br>TTGGTGTGAGTTAGAAGTAT |
| OGG1_03    |                                  | Qiagen Hs_OGG1_03 PM00013776                                                          |
| RARB_a1    | Forward<br>Reverse<br>Sequencing | TTGTTAAAGGGGGGATTAGAAT<br>Biotin-ACCCAAACAAACCCTACT<br>GTTTGAGGATTGGGAT               |
| RASSF1_01  |                                  | Qiagen Hs_RASSF1_01 PM00013292                                                        |
| RASSF1_02  |                                  | Qiagen Hs_RASSF1_02 PM00013300                                                        |
| RASSF1_03  |                                  | Qiagen Hs_RASSF1_03 PM00013307                                                        |
| SNAI1_01   |                                  | Qiagen Hs_SNAI1_01 PM00196588                                                         |
| TCF3_01    |                                  | Qiagen Hs_TCF3_01 PM00072219                                                          |
| TSC2_02    |                                  | Qiagen Hs_TSC2_02 PM00172886                                                          |
| TWIST 1_01 |                                  | Qiagen Hs_TWIST_01_ PM00030121                                                        |
| VEGFA_01   |                                  | Qiagen Hs_VEGFA_01 PM00121968                                                         |
| VHL_01     |                                  | Qiagen Hs_VHL_01 PM00014504                                                           |
| ZNF582_01  |                                  | Qiagen Hs_ZNF582_01 PM00071925                                                        |

<sup>a</sup>Assays were designed in-house (alphanumeric suffix) or acquired commercially from QIAGEN (numerical suffix).

<sup>b</sup>Types of in-house designed primers.
