# Supplementary material for: Molecular Pap smear: HPV genotype and DNA methylation of ADCY8, CDH8, and ZNF582 as an integrated biomarker for high-grade cervical cytology
Source: PubMed Central journal article supplement (PMC5022163; doi:10.1186/s13148-016-0263-9), 2016-09-13
Supplement: 13148_2016_263_MOESM3_ESM.pdf [file 13148_2016_263_MOESM3_ESM.pdf]

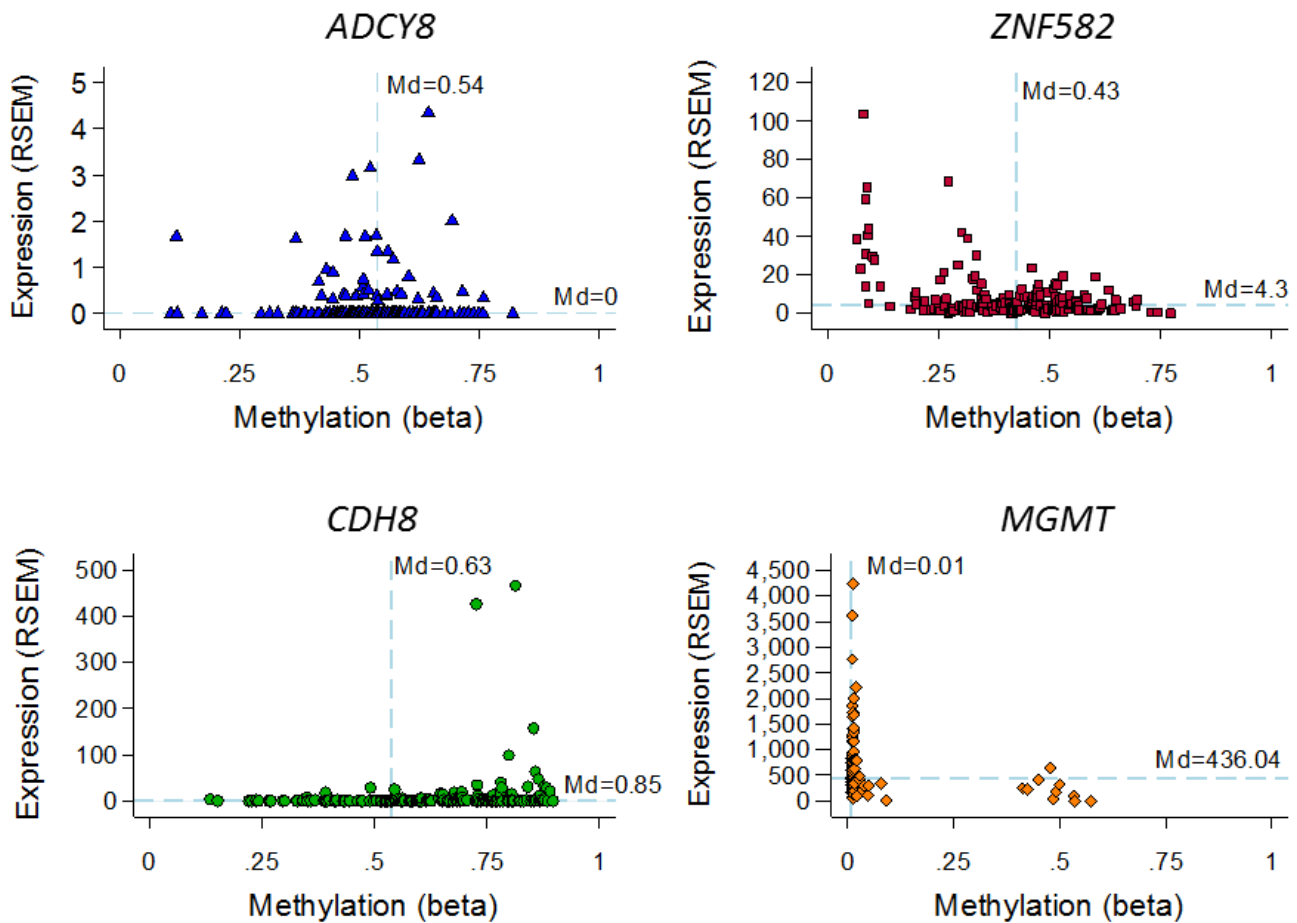

**Supplementary Figure S1.** DNA methylation and gene expression of *ADCY8*, *CDH8*, *ZNF582*, and *MGMT* in the TCGA cervical cancer cohort. Correlation plot for 181 patient tumors using paired median CpG methylation (beta value) and expression value (RSEM-normalized) from each sample. Median values (Md) for each axis are marked with a dotted line. (*ADCY8*:  $\rho = 0.01$ ,  $p = 0.94$ ; *ZNF582*:  $\rho = -0.23$ ,  $p = 0.001$ ; *CDH8*:  $\rho = 0.27$ ,  $p < 0.001$ ; *MGMT*:  $\rho = -0.17$ ,  $p = 0.03$ ).
