# Supplementary material for: Molecular Pap smear: HPV genotype and DNA methylation of ADCY8, CDH8, and ZNF582 as an integrated biomarker for high-grade cervical cytology
Source: PubMed Central journal article supplement (PMC5022163; doi:10.1186/s13148-016-0263-9), 2016-09-13
Supplement: 13148_2016_263_MOESM4_ESM.pdf [file 13148_2016_263_MOESM4_ESM.pdf]

**Supplementary Table S3** Logistic regression analysis of HPV and HPV + *ZNF582* for predicting abnormal (LSIL/HSIL) cytology

| Variable                   | Coefficient ( $\beta$ ) | SE   | z     | P>z  | OR    | 95% CI |    |       |
|----------------------------|-------------------------|------|-------|------|-------|--------|----|-------|
| Univariable model          |                         |      |       |      |       |        |    |       |
| HPV <sup>a</sup>           | 1.77                    | 0.27 | 6.50  | 0.00 | 5.86  | 3.44   | to | 9.99  |
| constant                   | -1.66                   | 0.47 | -3.52 | 0.00 | 0.19  | 0.08   | to | 0.48  |
| Multivariable model        |                         |      |       |      |       |        |    |       |
| HPV <sup>a</sup>           | 1.80                    | 0.31 | 5.84  | 0.00 | 6.04  | 3.30   | to | 11.04 |
| <i>ZNF582</i> <sup>b</sup> | 2.69                    | 0.88 | 3.05  | 0.00 | 14.72 | 2.61   | to | 83.06 |
| constant                   | -2.51                   | 0.66 | -3.80 | 0.00 | 0.08  | 0.02   | to | 0.30  |

HPV, human papillomavirus; HSIL, high-grade squamous intraepithelial lesion; LSIL, low-grade squamous intraepithelial lesion; ZNF, *ZNF582* gene; SE, standard error; z, z-score.

<sup>a</sup>The HPV genotype identified in each sample was coded accordingly: HPV undetected (0), not classifiable (1), possibly carcinogenic (2), and carcinogenic (3).

<sup>b</sup>The quantified promoter methylation value (%) of *ZNF582* gene at CpG-position 3 of each sample was binarized accordingly: <1.1 (0),  $\geq$ 1.1 (1).
