# Supplementary material for: Molecular Pap smear: HPV genotype and DNA methylation of ADCY8, CDH8, and ZNF582 as an integrated biomarker for high-grade cervical cytology
Source: PubMed Central journal article supplement (PMC5022163; doi:10.1186/s13148-016-0263-9), 2016-09-13
Supplement: 13148_2016_263_MOESM5_ESM.pdf [file 13148_2016_263_MOESM5_ESM.pdf]

**Supplementary Table S4** Logistic regression analysis of HPV and HPV + 3-gene methylation markers for predicting HSIL cytology

| Variable                   | Coefficient ( $\beta$ ) | SE   | z     | P>z  | OR   | 95% CI |         |
|----------------------------|-------------------------|------|-------|------|------|--------|---------|
| <b>Univariable model</b>   |                         |      |       |      |      |        |         |
| HPV <sup>a</sup>           | 1.41                    | 0.32 | 4.42  | 0.00 | 4.09 | 2.19   | to 7.65 |
| constant                   | -3.95                   | 0.90 | -4.37 | 0.00 | 0.02 | 0.00   | to 0.11 |
| <b>Multivariable model</b> |                         |      |       |      |      |        |         |
| HPV <sup>a</sup>           | 1.55                    | 0.37 | 4.19  | 0.00 | 4.72 | 2.28   | to 9.74 |
| <i>ADCY8</i> <sup>b</sup>  | 1.16                    | 0.48 | 2.40  | 0.02 | 3.17 | 1.24   | to 8.15 |
| <i>CDH8</i> <sup>c</sup>   | 1.04                    | 0.46 | 2.26  | 0.02 | 2.82 | 1.15   | to 6.95 |
| <i>ZNF582</i> <sup>d</sup> | 1.36                    | 0.46 | 2.98  | 0.00 | 3.91 | 1.59   | to 9.59 |
| constant                   | -5.78                   | 1.13 | -5.12 | 0.00 | 0.00 | 0.00   | to 0.03 |

HPV, human papillomavirus; HSIL, high-grade squamous intraepithelial lesion; LSIL, low-grade squamous intraepithelial lesion; ZNF, *ZNF582* gene; SE, standard error; z, z-score.

<sup>a</sup>The HPV genotype identified in each sample was coded accordingly: HPV undetected (0), not classifiable (1), possibly carcinogenic (2), and carcinogenic (3).

<sup>b</sup>The quantified promoter methylation value (%) of *ADCY8* gene at CpG-position 7 of each sample was binarized accordingly: <5.8 (0),  $\geq$ 5.8 (1).

<sup>c</sup>The quantified promoter methylation value (%) of *CDH8* gene at CpG-position 3 of each sample was binarized accordingly: <3.0 (0),  $\geq$ 3.0 (1).

<sup>d</sup>The quantified promoter methylation value (%) of *ZNF582* gene at CpG-position 3 of each sample was binarized accordingly: <1.1 (0),  $\geq$ 1.1 (1).
